# Supplementary material
Source: PubMed Central journal article supplement (PMC6410607)
Supplement: jp8b12035_si_001.pdf [file jp8b12035_si_001.pdf]

## **Supporting Information**

# **Long-lived Dark Exciton Emission in Mn-doped CsPbCl<sub>3</sub>**

## **Perovskite Nanocrystals**

Kunyuan Xu, Jara F. Vliem, Andries Meijerink\*

*Condensed Matter and Interfaces, Debye Institute for Nanomaterials Science, Utrecht*

*University, 3508 TA Utrecht, The Netherlands*

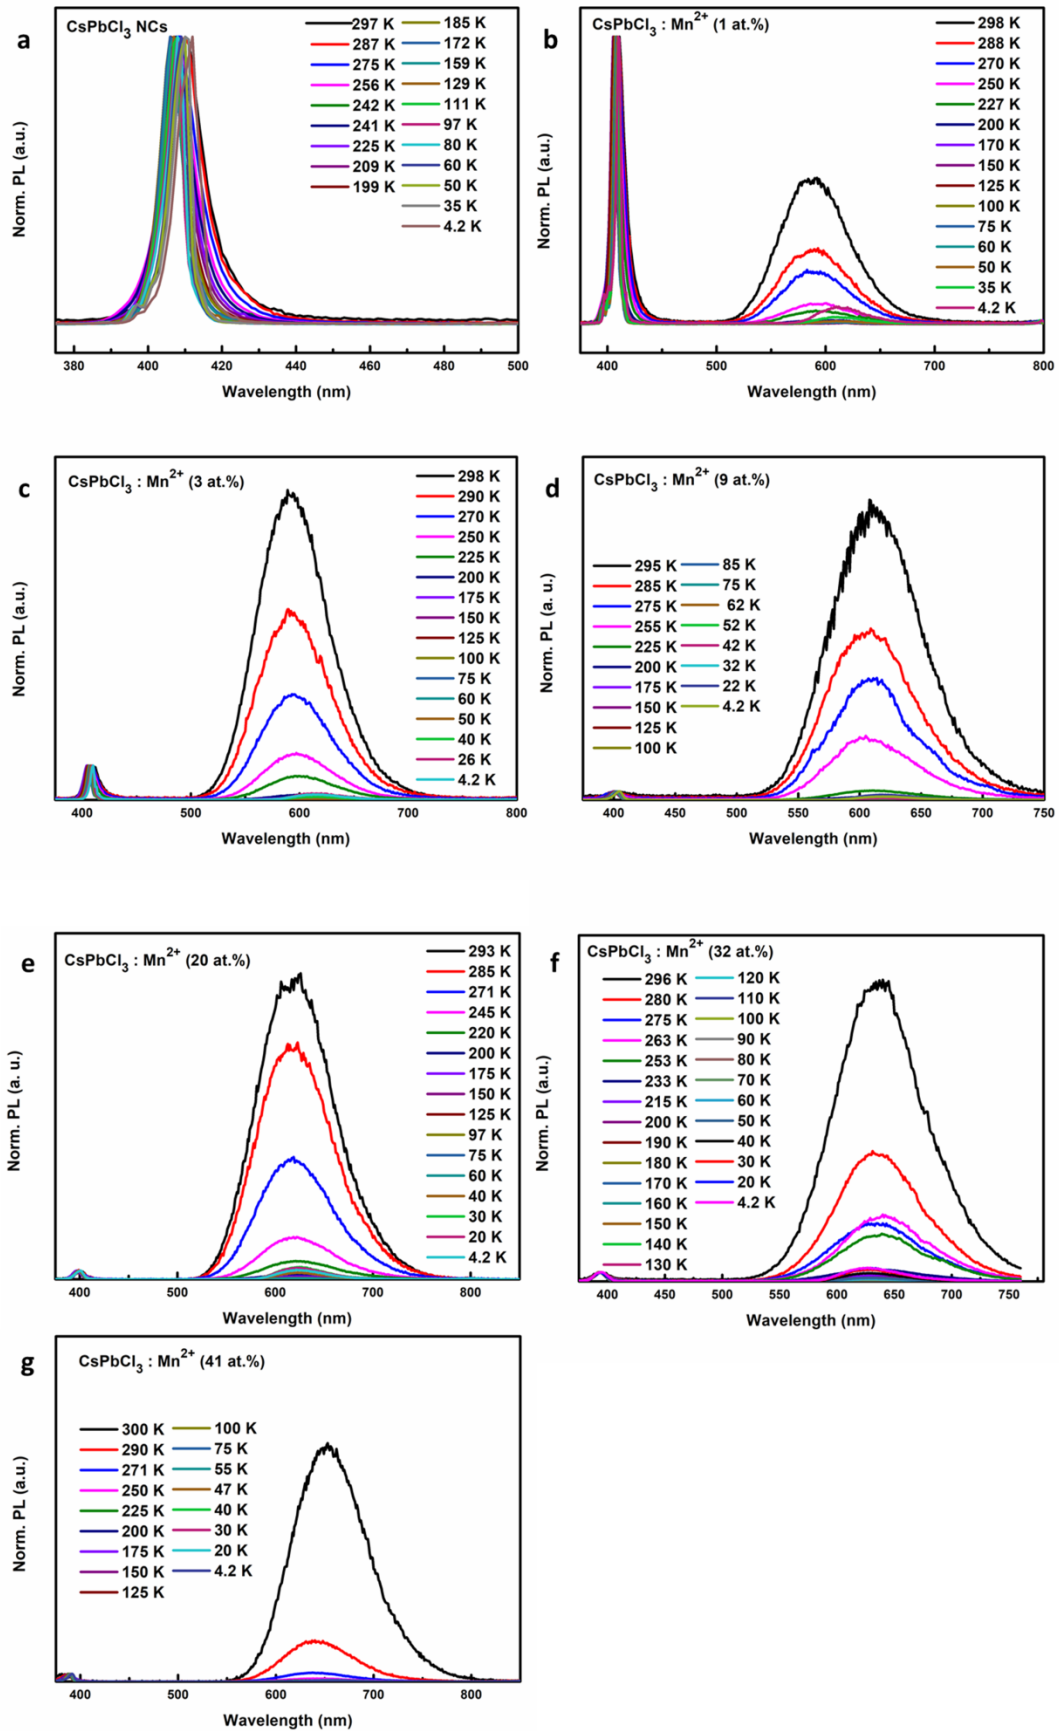

Figure S1. Normalized emission spectra of CsPbCl<sub>3</sub>: xMn<sup>2+</sup> (x=0, 1 at.%, 3 at.%, 9 at.%, 20 at.%, 32 at.%, 41 at.%) NCs at different temperatures (λ<sub>ex</sub>=355 nm)

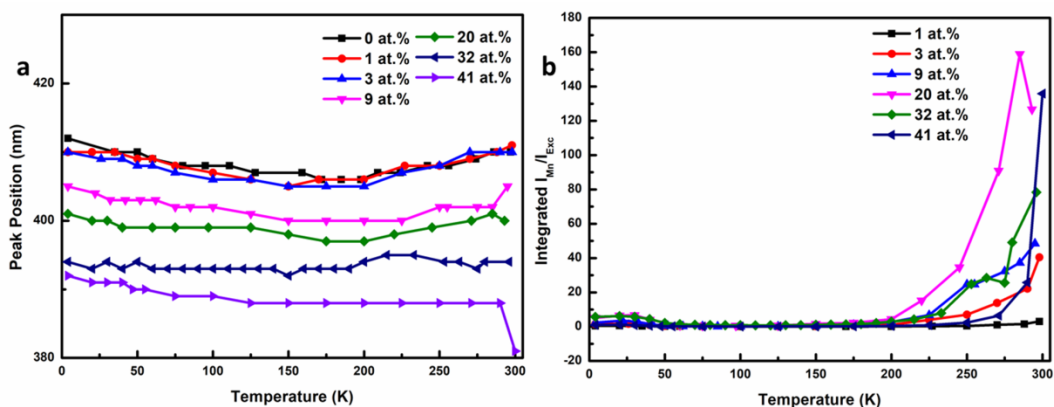

Figure S2. Optical properties of  $CsPbCl_3: xMn^{2+}$  ( $x=0, 1 \text{ at.}\%, 3 \text{ at.}\%, 9 \text{ at.}\%, 20 \text{ at.}\%, 32 \text{ at.}\%, 41 \text{ at.}\%$ ). (a) Exciton peak position as a function of temperature. (b) Integrated  $I_{Mn}/I_{Exc}$  at different temperatures

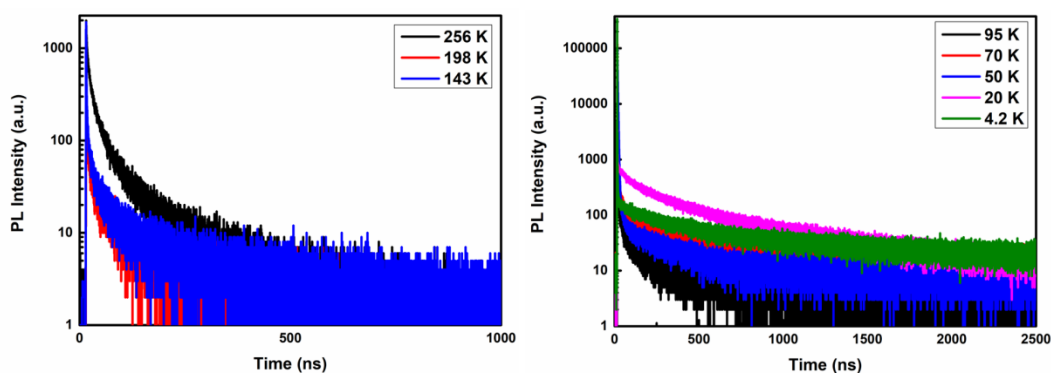

Figure S3. Exciton emission decay curve of pure (undoped)  $CsPbCl_3$  NCs at different temperatures plotted on semi-logarithmic scale ( $\lambda_{ex} = 376.8 \text{ nm}$ , pulse width: 65 ps)

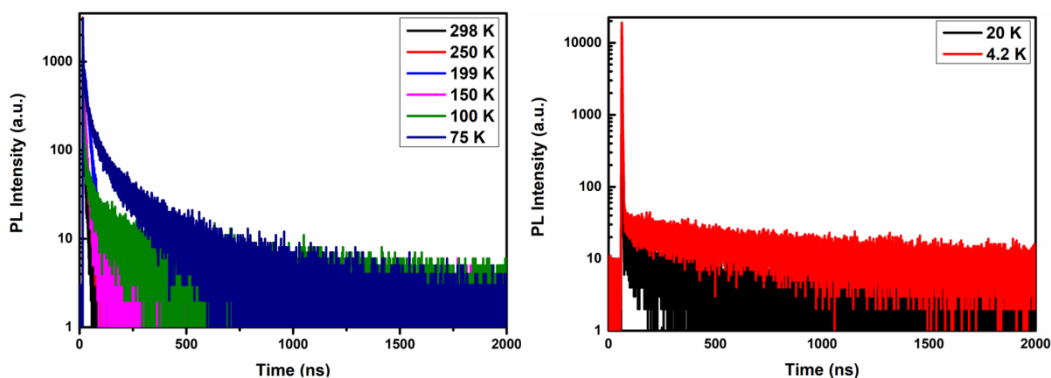

Figure S4. Exciton emission decay curves of  $CsPbCl_3: Mn^{2+}$  (1 at.%) NCs at different temperatures plotted on semi-logarithmic scale ( $\lambda_{ex} = 376.8 \text{ nm}$ , pulse width: 65 ps)

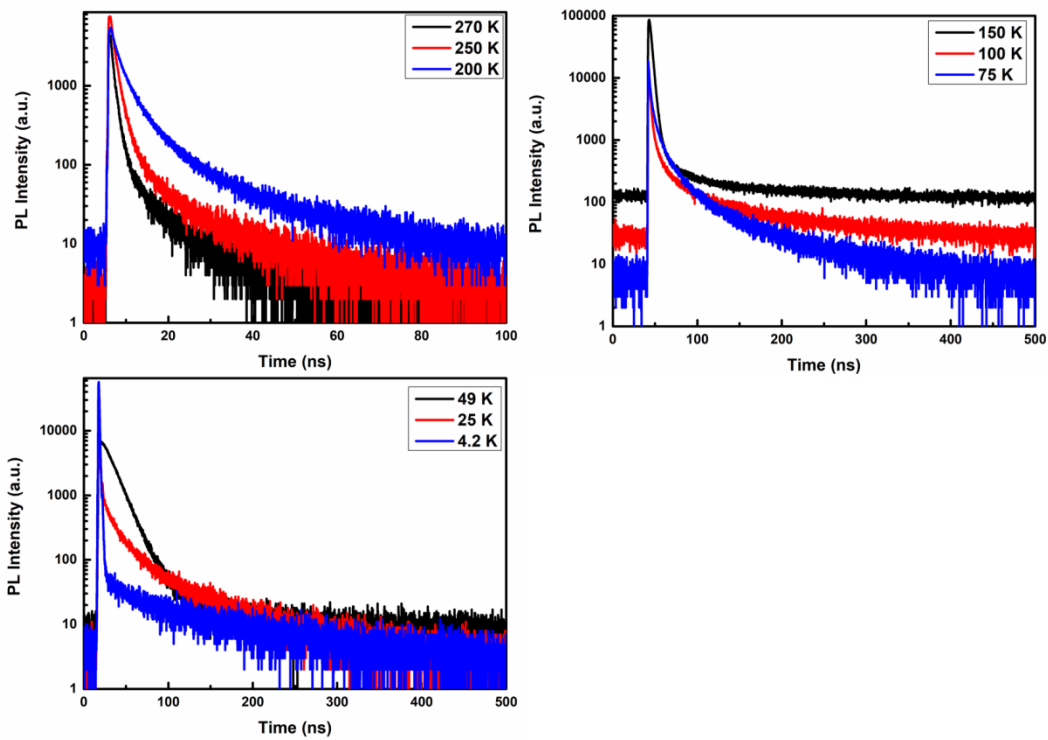

Figure S5. Exciton emission decay curve of sample CsPbCl<sub>3</sub>: Mn<sup>2+</sup> (3 at.%) NCs at different temperatures plotted on semi-logarithmic scale ( $\lambda_{\text{ex}} = 376.8$  nm, pulse width: 65 ps)

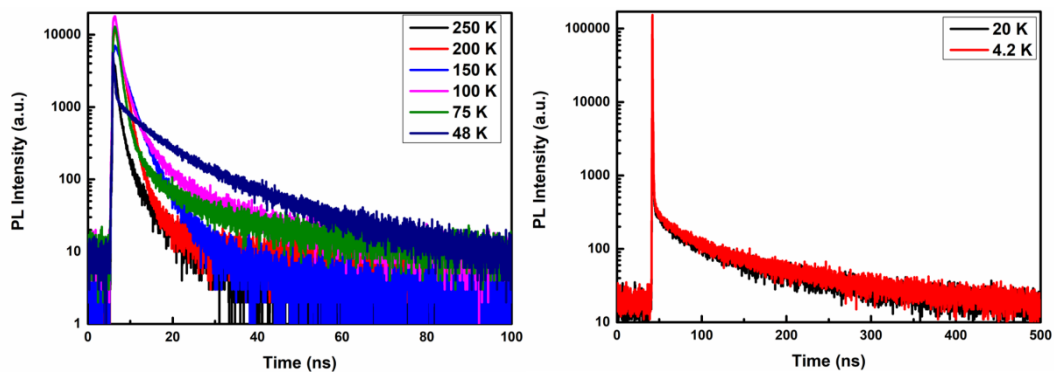

Figure S6. Exciton emission decay curve of sample CsPbCl<sub>3</sub>: Mn<sup>2+</sup> (41 at.%) NCs at different temperatures plotted on semi-logarithmic scale ( $\lambda_{\text{ex}} = 376.8$  nm, pulse width: 65 ps)

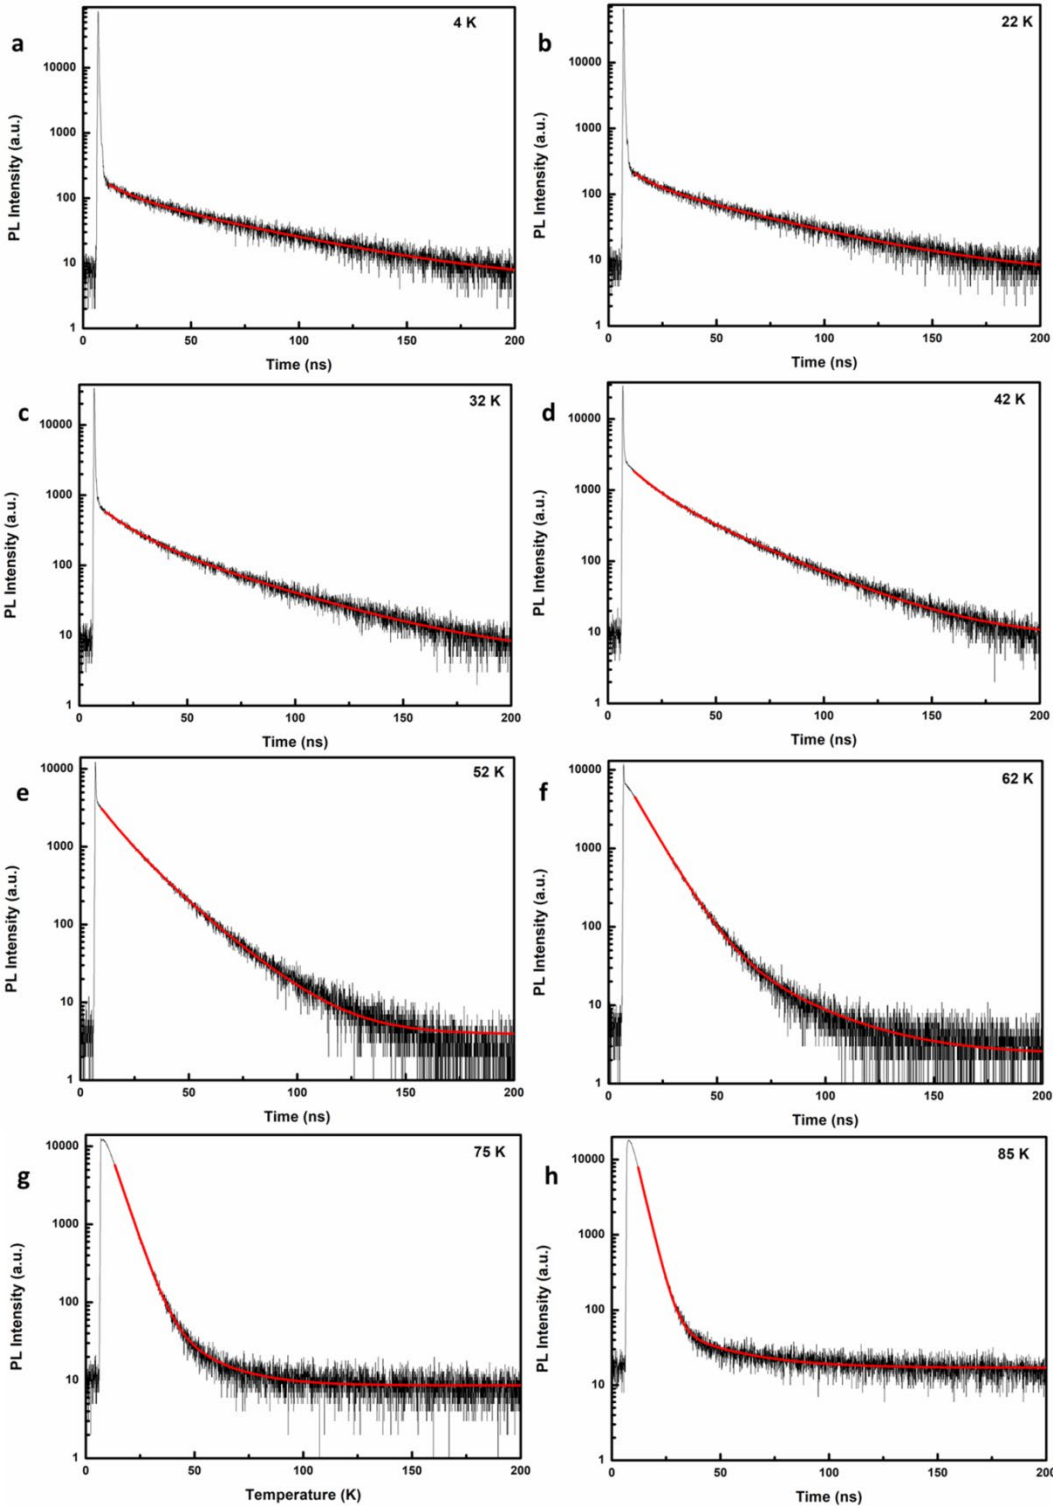

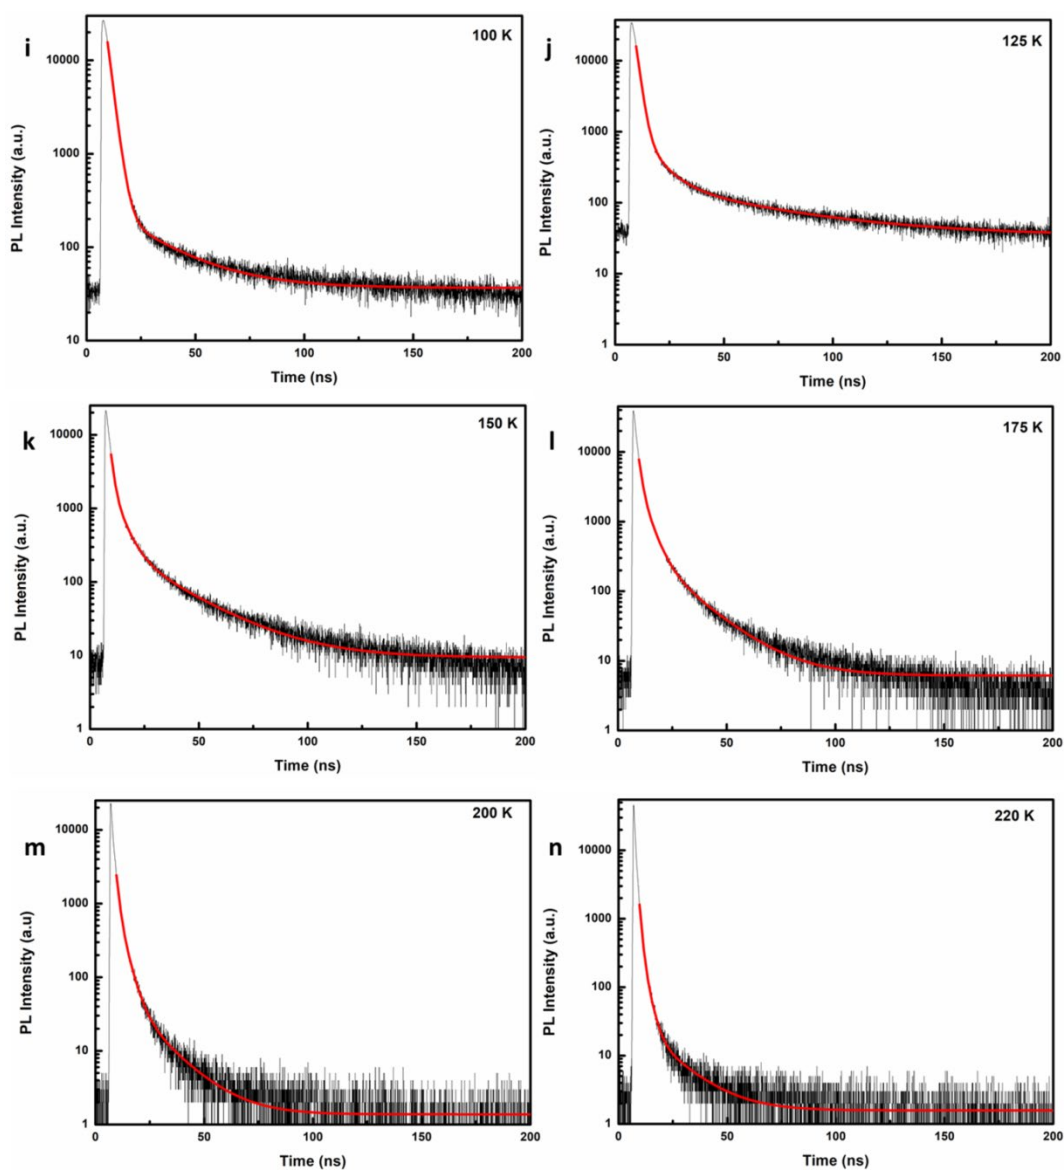

Figure S7. Exciton emission decay curves of CsPbCl<sub>3</sub>: Mn<sup>2+</sup> (9 at.%) NCs at different temperatures plotted on semi-logarithmic scale ( $\lambda_{\text{ex}} = 376.8$  nm, pulse width: 65 ps)

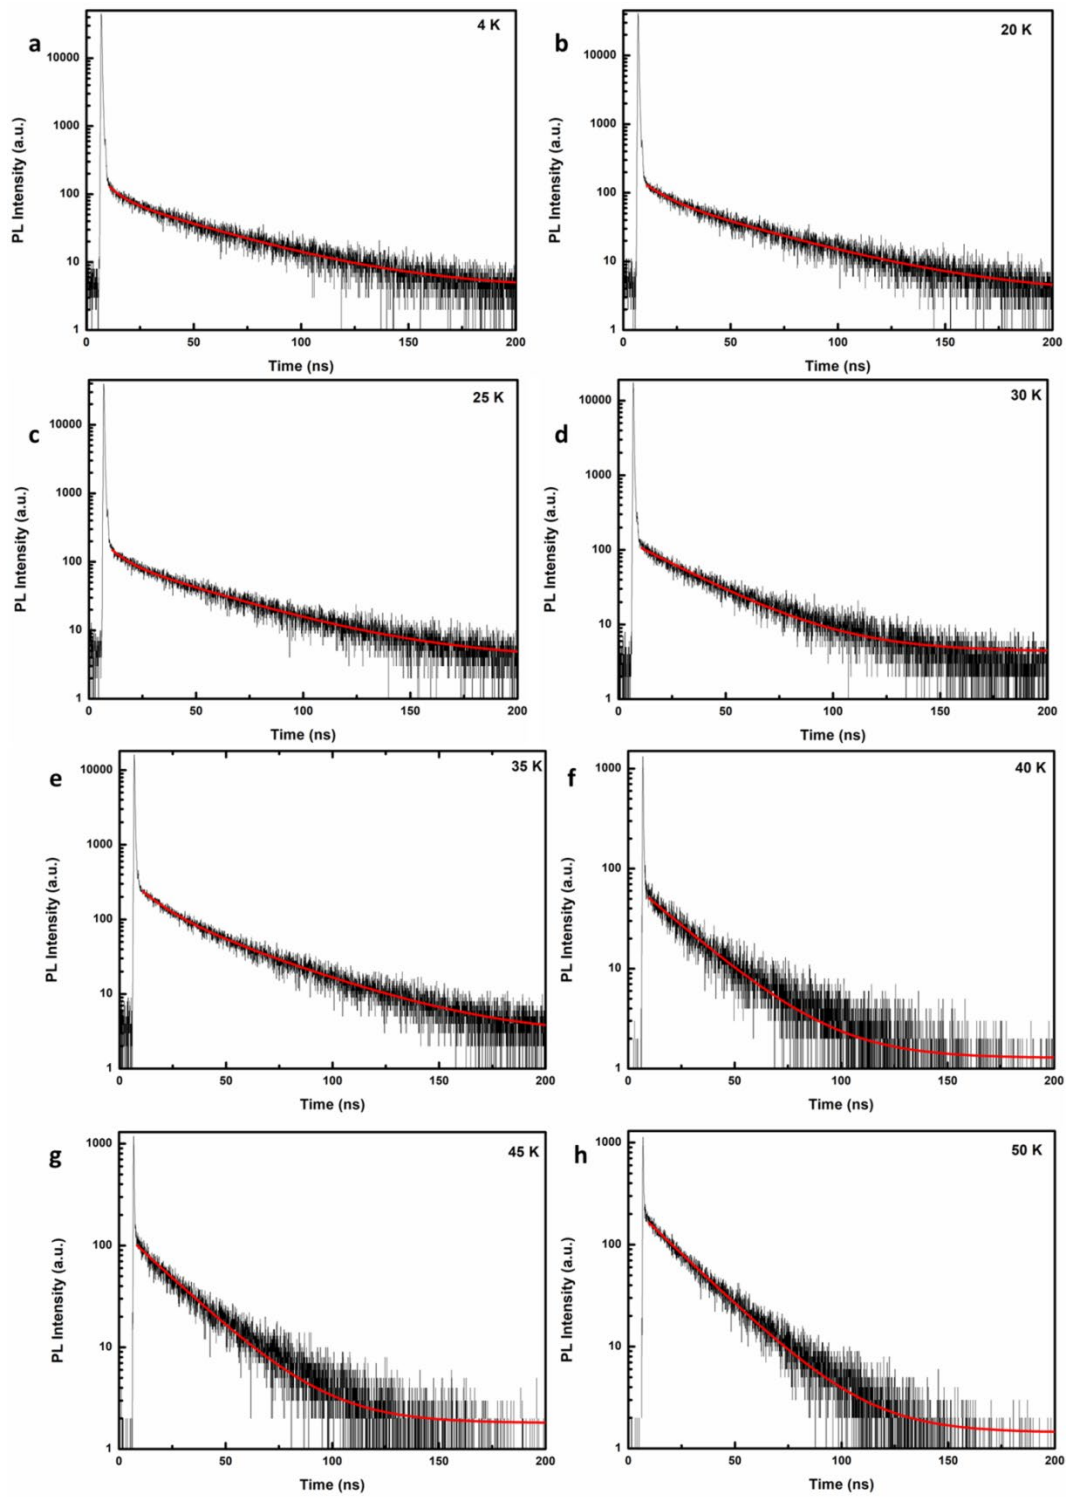

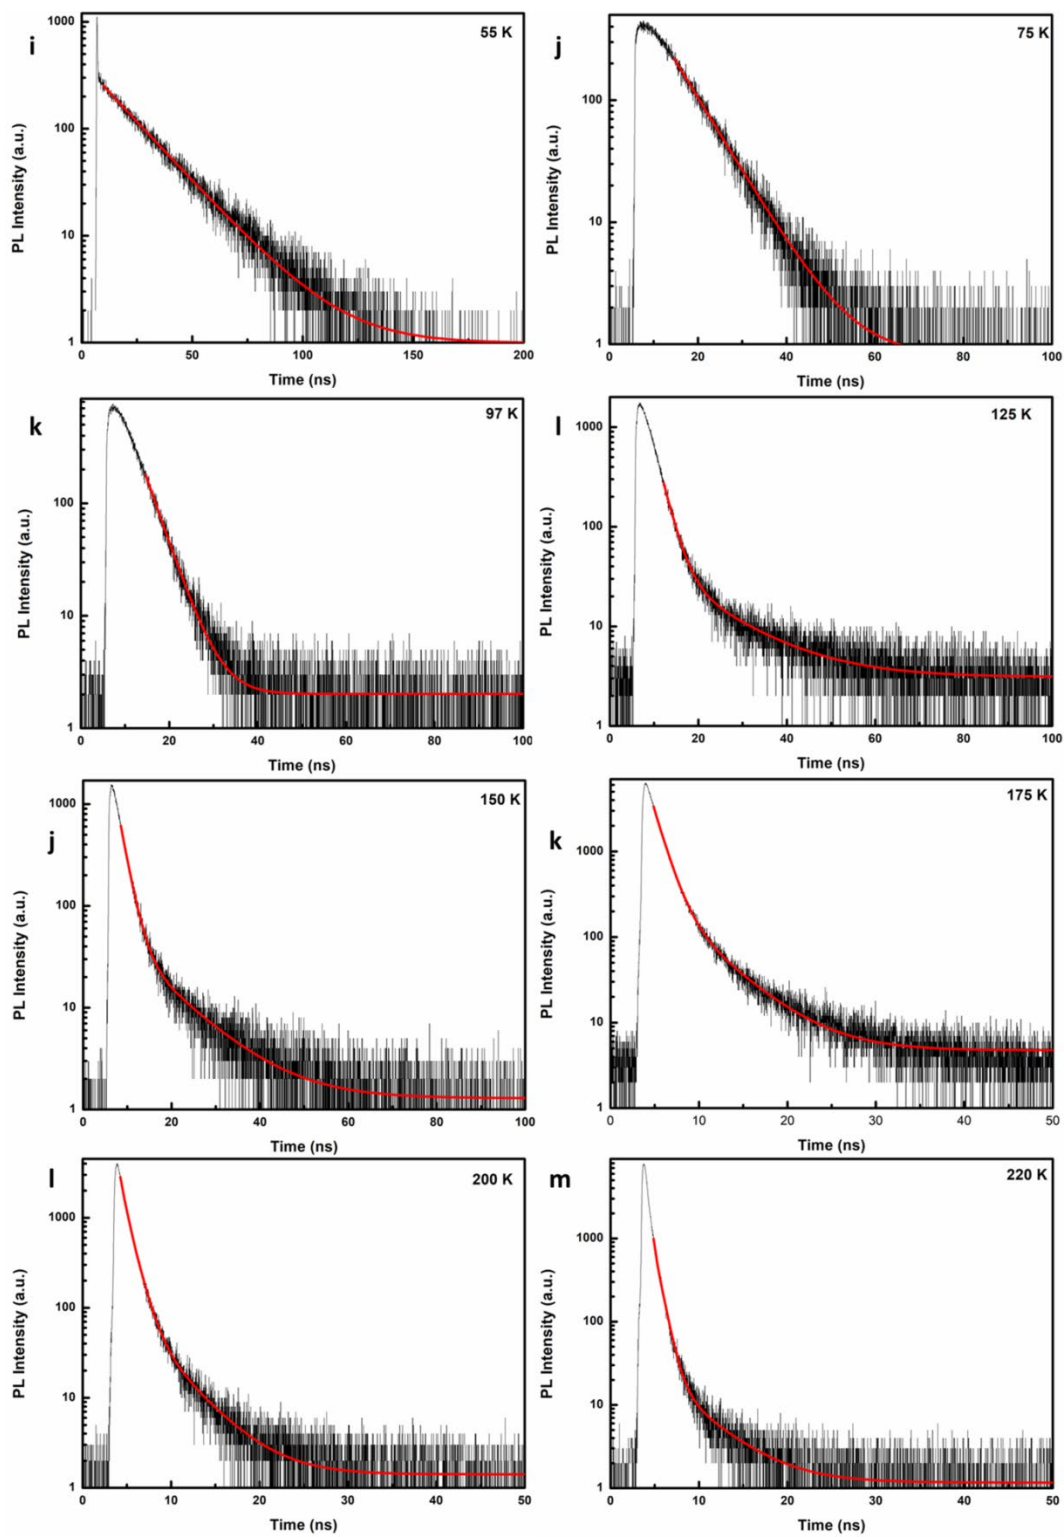

Figure S8. Exciton emission decay curves of CsPbCl<sub>3</sub>: Mn<sup>2+</sup> (20 at.%) NCs at different temperatures plotted on semi-logarithmic scale ( $\lambda_{\text{ex}} = 376.8$  nm, pulse width: 65 ps)



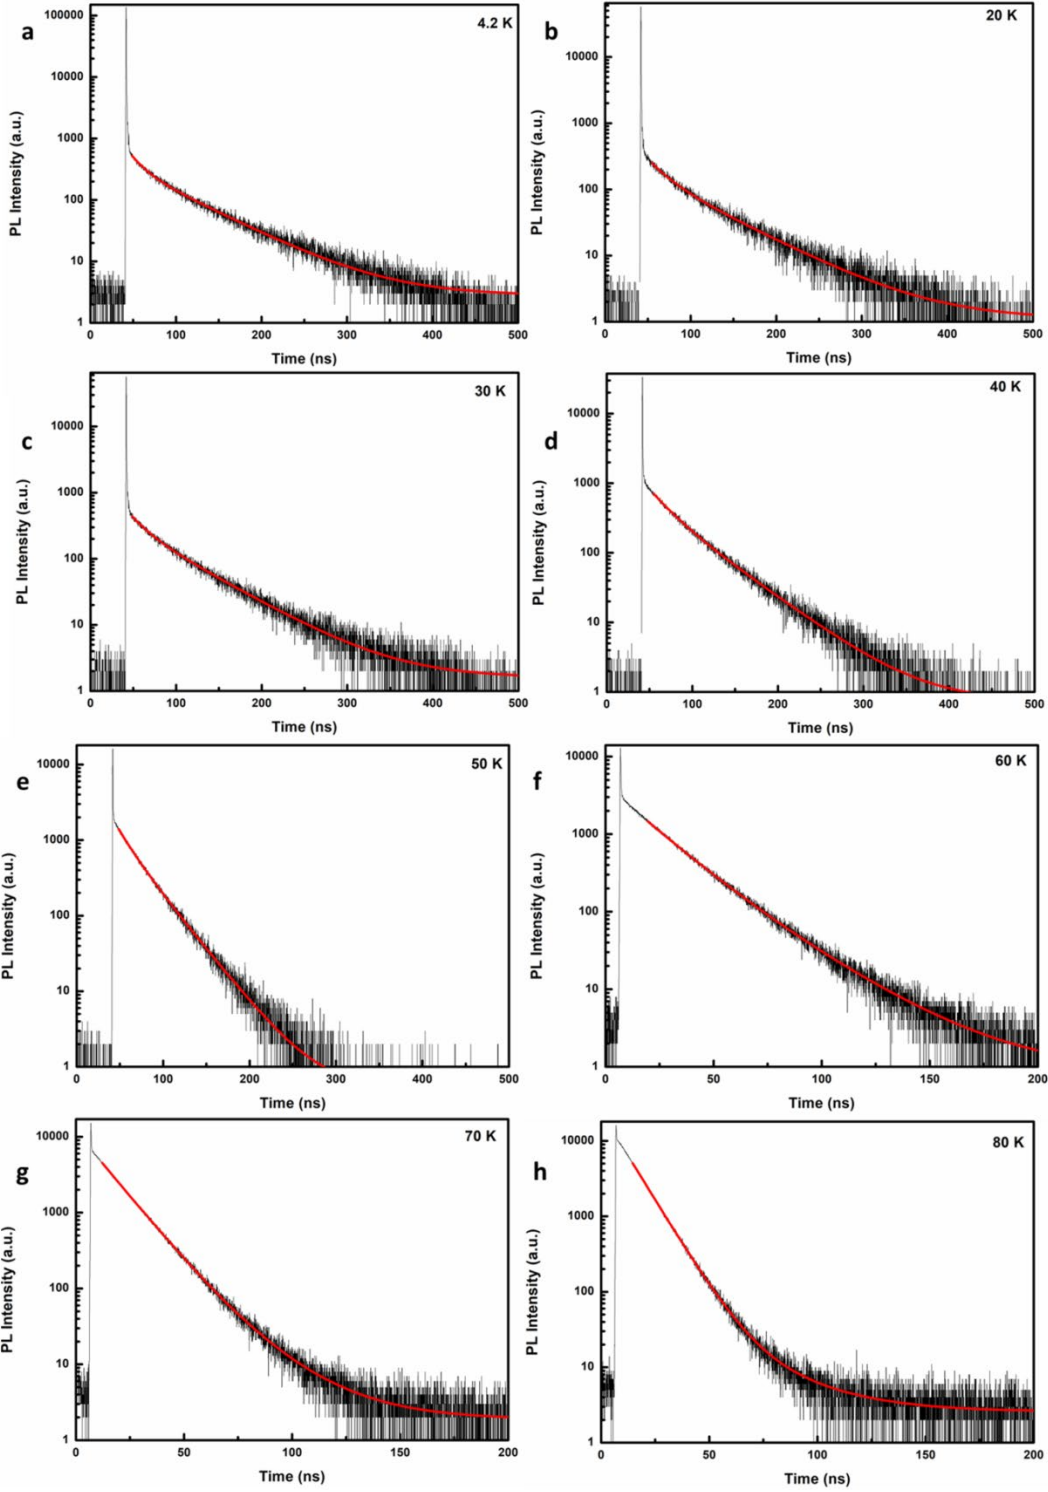

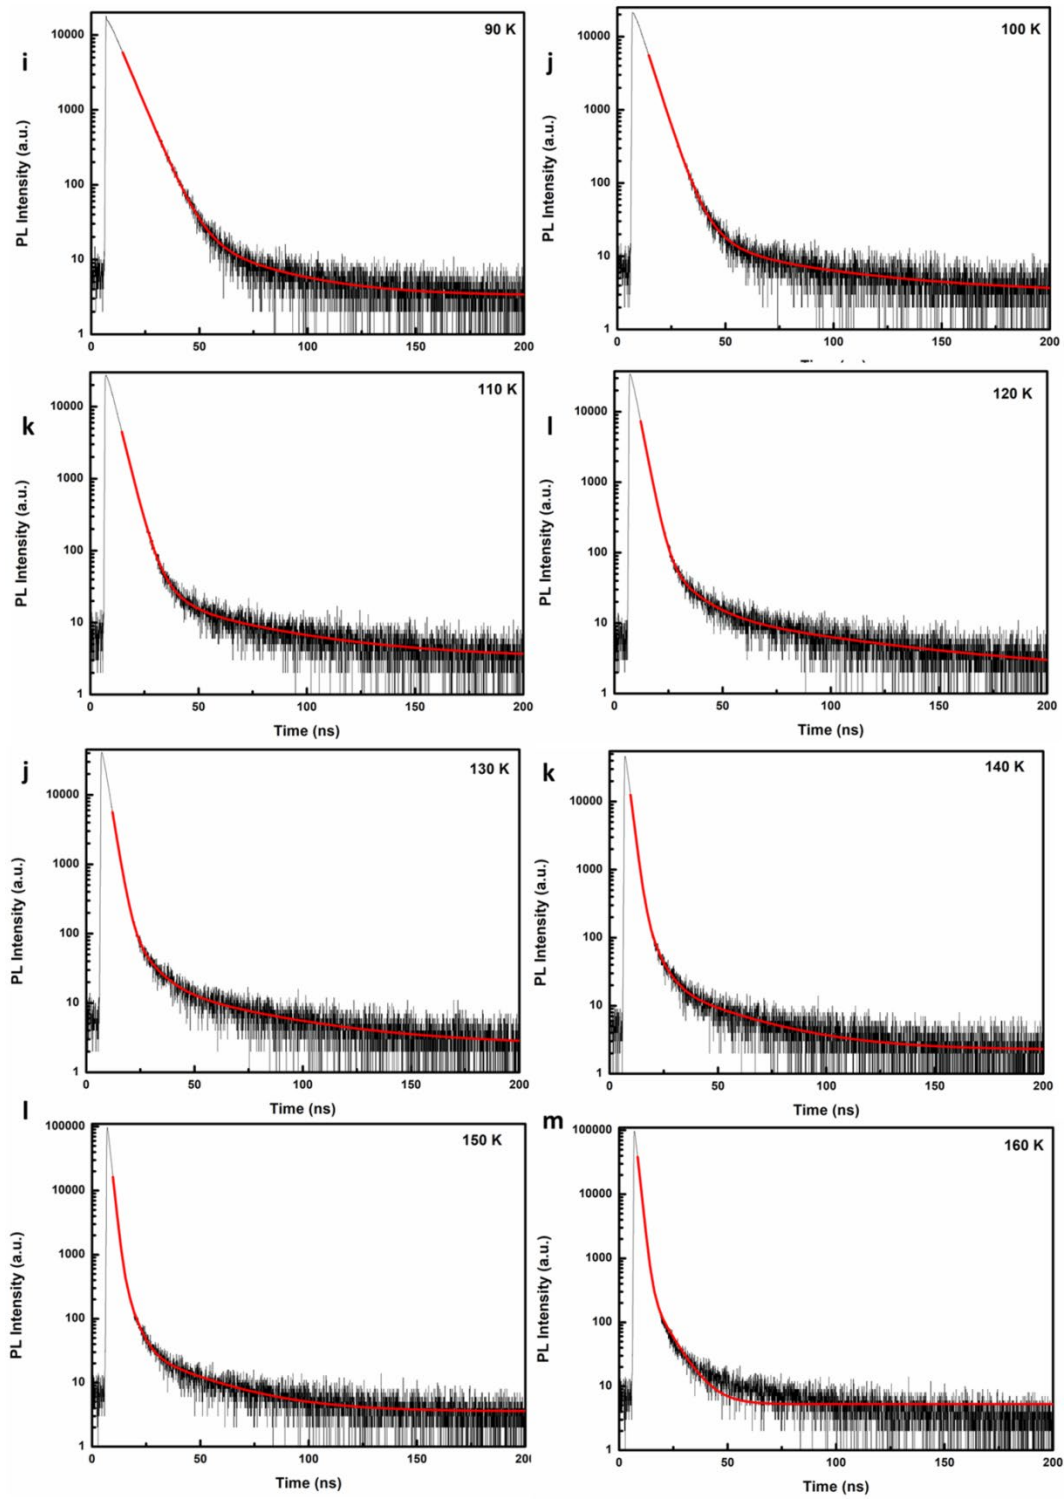

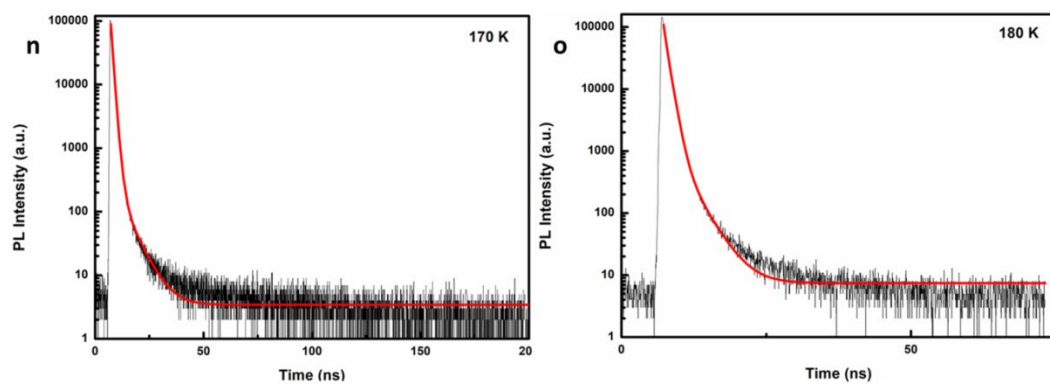

Figure S9. Exciton emission decay curves of CsPbCl<sub>3</sub>: Mn<sup>2+</sup> (32 at.%) NCs at different temperatures plotted on semi-logarithmic scale ( $\lambda_{\text{ex}} = 376.8$  nm, pulse width: 65 ps)
